RESEARCH ARTICLE

# Tuberculosis knowledge, attitudes, and practices among northern Ethiopian prisoners: Implications for TB control efforts

Kelemework Adane<sup>1,2\*</sup>, Mark Spigt<sup>2</sup>, Laturnus Johanna<sup>3</sup>, Dorscheidt Noortje<sup>3</sup>, Semaw Ferede Abera<sup>4</sup>, Geert-Jan Dinant<sup>2</sup>

**1** Department of Medical Microbiology and Immunology, College of Health Sciences, Mekelle University, Mekelle, Ethiopia, **2** Maastricht University/CAPHRI School for Public Health and Primary Care, Department of Family Medicine, Maastricht, the Netherlands, **3** Maastricht University, Faculty of Health, Medicine and Life Sciences, Maastricht, the Netherlands, **4** Department of Public Health, College of Health Sciences, Mekelle University, Mekelle, Ethiopia

\* [ingoldmlt@gmail.com](mailto:ingoldmlt@gmail.com)

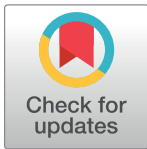

**OPEN ACCESS**

**Citation:** Adane K, Spigt M, Johanna L, Noortje D, Abera SF, Dinant G-J (2017) Tuberculosis knowledge, attitudes, and practices among northern Ethiopian prisoners: Implications for TB control efforts. PLoS ONE 12(3): e0174692. <https://doi.org/10.1371/journal.pone.0174692>

**Editor:** José-María García-García, Hospital San Agustín, SPAIN

**Received:** November 22, 2016

**Accepted:** March 12, 2017

**Published:** March 30, 2017

**Copyright:** © 2017 Adane et al. This is an open access article distributed under the terms of the [Creative Commons Attribution License](https://creativecommons.org/licenses/by/4.0/), which permits unrestricted use, distribution, and reproduction in any medium, provided the original author and source are credited.

**Data Availability Statement:** All relevant data are within the manuscript and its Supporting Information files.

**Funding:** This study was financially supported by Maastricht University through Nuffic scholarship and Mekelle University. The funder had no role in study design, data collection and analysis, decision to publish, or preparation of the manuscript.

**Competing interests:** The authors have declared that no competing interests exist.

## Abstract

### Introduction

Although awareness is an important component in tuberculosis (TB) control, we do not know how much Ethiopian prisoners know about TB. This study assessed the level of knowledge, attitudes, and practices (KAP) of prisoners about TB in eight northern Ethiopian prisons.

### Methods

Data were collected cross-sectionally from 615 prisoners using a standardized questionnaire between March and May 2016. The outcome variables were defined considering the basic elements about TB.

### Results

Out of 615 prisoners, only 37.7% mentioned bacteria as a cause of TB while 21.7% related TB to exposure to cold wind. Eighty-eight per cent correctly mentioned the aerial route of TB transmission and 27.3% had perceived stigma towards TB. The majority (63.7%) was not aware of the possibility of getting multi-drug-resistant strains when they would not adhere to treatment. Overall, only 24% knew the basic elements about TB, 41% had favorable attitudes, and 55% had a good practice. Prisoners who were urban residents were generally more knowledgeable than rural residents (adjusted OR = 2.16; 95% CI = 1.15–4.06). Illiterates were found to be less knowledgeable (adjusted OR = 0.17; 95% CI = 0.06–0.46), less likely to have a favorable attitude (adjusted OR = 0.31; 95% CI = 0.15–0.64), and less good practice (adjusted OR = 0.35; 95% CI = 0.18–0.69). Significant differences were also observed between the different study prisons.

## Conclusions

Knowledge of prisoners regarding the cause of TB and consequences of non-adherence to TB treatment was low. Knowledge on the transmission, symptoms, and prevention was fairly high. Health education interventions, focused on the cause and the translation of the knowledge to appropriate practices, are needed in all the study prisons. Special attention should be given to less educated prisoners, and to prisons with a high number of prisoners and those in remote areas.

## Introduction

Even though the incidence of tuberculosis (TB) has decreased worldwide, it remains a global health challenge. An estimated 10.4 million people developed TB in the year 2015 of which one-quarter was from Africa [1]. The disease is more prevalent in congregate settings such as prisons [2]. Especially, it is much worse in sub-Saharan prisons due to the added problems of human immunodeficiency virus (HIV) and poverty [3]. In Ethiopian prisons, a four to nine-fold higher prevalence of TB has been reported compared to the general population [4,5].

The global focus of TB control programs is on early diagnosis and treatment of cases in high TB and HIV-endemic areas [1]. However, the low TB case detection rate and the emergence of multi-drug-resistant strains have been a challenge [1,6]. Raising communities' awareness contributes for early diagnosis of TB which is one of the pillars of the End TB Strategy [1]. Studies documented a positive association between TB knowledge and care seeking and treatment adherence [7–9]. However, the level of knowledge should be known, also in relation to previous reports, before informed decisions can be made when designing and implementing appropriate educational interventions. In this regard, studies conducted in the general populations of sub-Saharan countries documented misconceptions ranging from 66.3% to 99.7% of the population on the etiology (cause) of TB, 27.6% to 90.1% on the symptoms, 0.1% to 48.6% on the transmission and 33.4% to 92.9% on prevention methods [10–16]. Stigma towards TB patients has been reported in up to 58.3% of the respondents [10,14]. Literacy status, socio-cultural differences, gender, and spatial variations have been reported to be factors affecting TB knowledge, attitude and practices (KAP) [11,13,16].

Baseline data regarding prisoners' knowledge of TB and related factors are limited. Studies conducted in prisons of Brazil [17] and Texas [18] reported gaps on some specific TB KAP variables. In a Brazilian prison, only 5.0% and 3.6% of the prisoners could mention the TB symptoms and prevention methods, respectively, and in a USA prison 43.0% of the prisoners had a perceived stigma towards TB. To our knowledge, in sub-Saharan prisons, only one study assessing prisoners knowledge was conducted six years ago in Eastern Ethiopian prisons [19]. This study reported a moderate level of knowledge about TB and revealed some misconceptions about its causes, control and prevention. This study was, however, limited in scope in that it did not address the attitude, and was only conducted among presumptive TB cases.

Moreover, in culturally diversified countries like Ethiopia, TB knowledge-level has been reported to show significant spatial variations [16]. In addition, through the Internet and intensive educational campaigns, healthcare information can reach many people quickly and increase the level of knowledge among people [20]. In a previous study among Ethiopian prisons we observed quite some TB cases with long-lasting symptoms without being diagnosed [4], so we expect that KAP among Ethiopian prisoners is still very low. This study aimed at assessing the level of knowledge, attitude, and practices of prisoners about TB and related factors.

## Methods

### Study setting

This study was conducted in eight northern Ethiopian prisons located in the regions Tigray (Mekelle, Abi Adi, Alamata, Humera, and Wukro) and Amhara (Dessie, Debre Tabor, and Finote Selam) between March and May 2016. In 2015, Ethiopia ranked 10th among the 22 high TB burden countries with an estimated TB incidence of 192 per 100,000 people [1]. The country had a registered prison population of 112,361 (136/100,000 persons) in 2010 [21], which is higher than the imprisonment rates observed in some sub-Saharan African countries such as in Kenya (121/100,000 persons), and Malawi (76/100,000 persons) [21].

### Study design and sampling technique

This was a cross-sectional study, which was also part of a baseline measurement for an educational interventional study aimed to increase TB screening and case detection rate in northern Ethiopian prisons. Larger prison centers located in the main cities of Amhara and Tigray regions were considered as eligible while small jails were excluded ( $n = 22$ ). Larger prisons were defined as institutions that incarcerate people for longer periods of time, such as many years, while small jails were institutions that confine people for shorter periods of time. A multistage cluster sampling technique was employed to randomly select the study prisons and the prisoners. Only prisoners who would stay imprisoned for a year or longer from the date of the selection were included, since this baseline measurement was part of an intervention study. Prisoners younger than 18 years of age and those mentally ill were excluded.

### Sample size determination

The sample size was determined using a single proportion formula,  $n_1 = z^2 p (1-p)/d^2$ , where  $n_1$  was the initial sample size, considering a confidence level of 95%, an estimated overall proportion of good knowledge about TB of 52% [12], and a precision of 5%. After using a finite population correction,  $n_2 = n_1/(1 + (n_1/N))$ , where  $N$  was the total number of the prisoners in the study sites ( $N = 8,874$ ), multiplying by 1.5 to account for the clustering effect, and adding a 15% non-response rate, we obtained a final sample size of 634. This figure was then proportionally allocated to each prison as per the total numbers of prisoners.

### Questionnaire and interviewing

We used a semi-structured standardized KAP questionnaire to collect data. The questionnaire was designed in English following the WHO guidelines [22] and was translated into the local languages, Amharic and Tigrigna. The questionnaire consisted of 38 questions, divided into two parts. Part one addressed the socio-demographic characteristics and prison history. The second part addressed aspects related to TB knowledge, attitude, and practices. Briefly, questions regarding the etiology, transmission, prevention, and treatment of TB, beliefs, and feelings about TB and TB patients were included. The interviewing was done by trained data collectors (prison nurses, or trained inmates). For sites with a shortage of prison health professionals, prisoners who were relatively educated (some with a diploma in clinical nursing) were recruited and trained for two days on how to undertake the interview. The interviewing process was closely monitored by the investigators in which the first one-fourth of the interviews were monitored by listening and observing the interviewing process. The investigators also

stayed close around the interviewing area to assist the interviewers on call for any ambiguity for the rest of the interviews.

## Statistical analysis

Data were entered in EpiData version 3.1 software and the analysis was performed using SPSS version 20.0. Descriptive statistics was used to report frequencies and proportions. Bivariate and multivariate logistic regression analysis was performed to examine the association of independent variables with our outcome variables. Our outcome variables of interest were knowledge about TB, attitude towards TB, and practice. We checked whether there was a clustering effect at the prison level for the outcome variables following the mixed procedure for a possible consideration of the multilevel logistic model. We found, however, that there was no statistically significant variability in the intercepts of the outcome variables across the prison sites; the p values for the intercept estimates of knowledge, attitude, and practice were 0.14, 0.25, and 0.13, respectively.

Knowledge was assessed considering the following crucial elements: able to recognize germ/bacteria as a cause of TB, able to recognize the airborne route of transmission, able to recognize a cough of 2 weeks and longer as a symptom, able to realize covering mouth and nose when coughing/sneezing as a prevention measure, and able to know the free TB treatment availability. Prisoners that mentioned all these five items were categorized as having a 'good' knowledge and those who missed one or more of these items were categorized as having 'poor' knowledge. Attitude was assessed using three questions: able to mention that TB is a very serious disease, showing a favorable reaction if suspected having TB related symptoms (i.e. seeking health care instead of being ashamed of or hopeless), and showing a compassion and desire to help people with TB. Prisoners that mentioned these three items were categorized as having a 'favorable' attitude and the others were categorized as having 'unfavorable' attitude. Similarly, practice was assessed using two questions: preference of modern health care for treatment and the intention to visit the facility as soon as realizing having a TB related symptom. Prisoners who mentioned these two items were categorized as having a 'good' practice and the rest were categorized as having a 'poor' practice. All the potential predictor variables were tested against the dichotomized knowledge, attitude, and practice. Multi-collinearity among the independent variables was assessed considering the variance inflation factor of greater than 10 (for our data, the maximum was 3.86). Covariates with p-values of  $\leq 0.25$  in the bivariate analysis were considered for inclusion in the multivariate model. Accordingly, the multivariate models for the level of knowledge, attitude, and practice consisted of five, four, and six variables, respectively. Educational status and prison site were included in the three models. In addition, age group and occupation were added to the final models of the knowledge and practice level whereas residence was included in the knowledge and attitude model. Duration of imprisonment was added to the attitude model and knowledge and attitude level to the practice model. Comparisons between subgroups with the outcomes were expressed as odds ratios (OR) with a 95% confidence interval (CI). A p-value of  $\leq 0.05$  was considered to declare a statistically significant association.

## Ethical consideration

The study protocol was approved by the ethical review committee of the College of Health Sciences, Mekelle University. All participants were asked for a written informed consent, and those consented were enrolled. For all illiterate participants, data collectors informed each of them and confirmed the willingness of the participants to sign the informed consent sheet.

The consent procedure for these illiterate participants was also approved by the ethics review committee.

## Results

### Socio-demographic characteristics

Of the total number of invited participants ( $n = 634$ ), five (1%) refused to participate in the study. Fourteen questionnaires with missing demographic characteristics were excluded, so the final analysis was performed with 615 participants. The number of participants included ranged from 22 in Abi Adi to 173 in Mekelle prison. Of the 615 participants, the majority 597 (97%) was male. The median age was 28 years with an interquartile range (IQR) of 12 years. The median duration of imprisonment was 13 months (IQR = 29 months). Almost half (46%) of the participants was farmer and 13% was illiterate. Thirty-seven participants (6%) reported a history of having TB disease.

### Knowledge about tuberculosis

The prisoners' knowledge about TB is shown in [Table 1](#). In this study, only 37.7% of the participants recognized germ/ bacteria as a cause of TB. Twenty-two percent mentioned that it is mainly caused by exposure to cold. The majority (88.0%) correctly mentioned that TB is transmitted through coughing droplets and 65.7% mentioned covering the mouth when coughing/ sneezing as a measure to prevent TB. However, 11.9% and 15.0% of the participants mentioned inappropriate methods including keeping windows closed when they are with chronically coughing people and/or TB patients in a room and avoiding shaking hands, respectively. The majority (88.3%) described that TB is curable with modern drugs, but about one-third (35.5%) did not know the free TB treatment availability.

### TB knowledge and associated factors

[Table 2](#) shows the relationships between TB knowledge, using the five crucial points, and potential predictor variables. Of 615 participants, 149 (24%; 95% CI = 21%–28%) had a good level of knowledge about TB. Government employees had a significantly higher level of knowledge compared to farmers (AOR 2.92; 95% CI = 1.21–7.03). Prisoners that were urban dwellers were more knowledgeable than rural prisoners (AOR = 2.16; 95% CI = 1.15–4.06). There was also an association between the level of education and TB knowledge. Another interesting finding was that there appeared to be a significant variation in the level of TB knowledge across the study prisons: compared to prisoners of Mekelle, prisoners of Debre Tabor (AOR = 2.71; 95% CI = 1.36–5.42), and Finote Selam (AOR = 4.16; 95% CI = 2.05–8.43) were more knowledgeable, whereas those imprisoned in Wukro (AOR = 0.12; 95% CI = 0.03–0.57), and Humera (AOR = 0.21; 95% CI = 0.06–0.74) were less knowledgeable.

### Attitudes and practices about tuberculosis

The majority of the participants (84.2%) believed that TB is a very serious disease. Sixty-nine percent mentioned that they would not feel feared or ashamed when they would have TB symptoms, but would simply visit a health care facility. A considerable proportion (27.3%) had stigmatizing thoughts towards TB patients (i.e. they mentioned that they fear such people and would stay away from them or would not show any feeling instead of showing compassion and a desire to help). The majority (82.6%) preferred to visit modern health care ([Table 3](#)).

**Table 1. Knowledge of northern Ethiopian prisoners about tuberculosis stratified by the status of the previous history of TB disease, 2016 (N = 615).**

| Variable                                             | Had history of TB, n (%)<br>n = 37 | Had no TB ever, n (%)<br>n = 578 | Total, n (%)<br>N = 615 | p-value ** |
|------------------------------------------------------|------------------------------------|----------------------------------|-------------------------|------------|
| <b>Cause of TB</b>                                   |                                    |                                  |                         | 0.65       |
| Bacteria*                                            | 17 (45.9)                          | 215 (37.2)                       | 232 (37.7)              |            |
| Cold wind                                            | 5 (13.5)                           | 128 (22.1)                       | 133 (21.7)              |            |
| Smoking                                              | 3 (8.2)                            | 43 (7.4)                         | 46 (7.5)                |            |
| Spoiled soil (soil with a bad odor)                  | 5 (13.5)                           | 61 (10.6)                        | 66 (10.7)               |            |
| Poor hygiene                                         | 2 (5.4)                            | 53 (9.2)                         | 55 (8.9)                |            |
| Don't know                                           | 5 (13.5)                           | 60 (10.4)                        | 65 (10.6)               |            |
| Others <sup>†</sup>                                  | 0 (0)                              | 18 (3.1)                         | 18 (2.9)                |            |
| <b>Mode of transmission</b>                          |                                    |                                  |                         | 0.45       |
| Through coughing droplets*                           | 36 (97.3)                          | 506 (87.6)                       | 542 (88.0)              |            |
| Through shaking hands                                | 0 (0)                              | 28 (4.8)                         | 28 (4.6)                |            |
| Through sharing dish                                 | 0 (0)                              | 22 (3.8)                         | 17 (2.8)                |            |
| Don't know                                           | 1 (2.7)                            | 22 (3.8)                         | 28 (4.6)                |            |
| <b>Signs and symptoms<sup>+</sup></b>                |                                    |                                  |                         |            |
| Cough for 2 weeks or above*                          | 28 (75.7)                          | 458 (79.2)                       | 486 (79.1)              | 0.67       |
| Hemoptysis                                           | 20 (54.1)                          | 278 (48.1)                       | 298 (48.5)              | 0.51       |
| Weight loss                                          | 16 (43.2)                          | 272 (47.1)                       | 288 (46.8)              | 0.73       |
| Ongoing fatigue                                      | 11 (29.1)                          | 190 (32.9)                       | 201 (32.7)              | 0.85       |
| Persistent fever                                     | 12 (42.4)                          | 157 (27.2)                       | 169 (27.5)              | 0.57       |
| Don't know                                           | 1 (2.7)                            | 35 (6.1)                         | 36 (5.9)                | 0.72       |
| Others <sup>††</sup>                                 | 40 (108.1)                         | 347 (60.1)                       | 387 (62.9)              | 1.00       |
| <b>Prevention methods<sup>+</sup></b>                |                                    |                                  |                         |            |
| Cover mouth when coughing/sneezing*                  | 23 (62.2)                          | 381 (65.9)                       | 404 (65.7)              | 0.72       |
| Washing hands                                        | 11 (29.7)                          | 188 (32.5)                       | 199 (32.4)              | 0.86       |
| Avoiding handshakes                                  | 6 (16.2)                           | 86 (14.9)                        | 92 (15.0)               | 0.81       |
| Isolating TB patients                                | 12 (32.4)                          | 214 (37.1)                       | 226 (36.7)              | 0.73       |
| Closing windows                                      | 4 (10.8)                           | 69 (11.9)                        | 73 (11.9)               | 1.00       |
| Avoid sharing dishes                                 | 10 (27.0)                          | 163 (28.2)                       | 173 (28.1)              | 1.00       |
| Vaccination                                          | 10 (27.0)                          | 169 (29.2)                       | 179 (29.1)              | 0.85       |
| Good nutrition                                       | 14 (37.8)                          | 130 (22.5)                       | 144 (23.4)              | 0.04       |
| Don't know                                           | 0 (0)                              | 27 (4.7)                         | 27 (4.4)                | 0.39       |
| <b>Is TB curable</b>                                 |                                    |                                  |                         | 0.16       |
| Yes                                                  | 36 (97.3)                          | 507 (87.7)                       | 543 (88.3)              |            |
| No                                                   | 1 (2.7)                            | 71 (12.3)                        | 72 (11.7)               |            |
| <b>Know free TB treatment availability</b>           |                                    |                                  |                         | 0.59       |
| Yes*                                                 | 26 (70.1)                          | 371 (64.2)                       | 397 (64.5)              |            |
| No                                                   | 11 (29.9)                          | 207 (35.8)                       | 218 (35.5)              |            |
| <b>Risk of defaulting from treatment<sup>+</sup></b> |                                    |                                  |                         |            |
| Death                                                | 28 (75.7)                          | 458 (79.2)                       | 486 (79.1)              | 0.54       |
| Relapse                                              | 12 (32.4)                          | 256 (44.3)                       | 268 (43.6)              | 0.17       |
| No cure                                              | 13 (35.1)                          | 232 (40.1)                       | 245 (39.8)              | 0.61       |
| Drug resistance                                      | 17 (45.9)                          | 206 (35.6)                       | 223 (36.3)              | 0.22       |
| Don't know                                           | 2 (5.4)                            | 8 (1.4)                          | 10 (1.6)                | 1.00       |
| <b>Vulnerability for TB</b>                          |                                    |                                  |                         | 0.43       |
| Prisoners                                            | 26 (70.3)                          | 440 (76.2)                       | 466 (75.8)              |            |

(Continued)

Table 1. (Continued)

| Variable          | Had history of TB, n (%) | Had no TB ever, n (%) | Total, n (%) | p-value ** |
|-------------------|--------------------------|-----------------------|--------------|------------|
|                   | n = 37                   | n = 578               | N = 615      |            |
| General community | 11 (29.7)                | 138 (23.8)            | 149 (24.2)   |            |

\*: the five crucial elements

¶: curse/demon, malnutrition

+: multiple responses possible

¶¶: chest pain, skin rash, nausea, severe headache

\*\* : p-value from the chi-square test

<https://doi.org/10.1371/journal.pone.0174692.t001>

### Overall attitude and associated factors

The attitude of prisoners towards TB and the relationship with the potential predictor variables is summarized in Table 4. Less than a half (41%; 95% CI = 37–45) of the prisoners had a favorable attitude towards TB. Respondents that were able to mention that TB is a very serious disease, those showing a favorable reaction if suspected having TB related symptoms and a desire to help people with TB were considered as having a favorable attitude. Significant variations in the level of attitude were observed by the educational level and study sites. By occupation, students (AOR = 1.88; 95% CI = 1.1–3.5) were found to have a higher level of favorable attitude compared to farmers.

### Overall practice and associated factors

More than half of the prisoners, 55% (95% CI = 51.1–58.9), had a good practice related to TB. There was a significant variation in practice by the level of education and study sites. Having a good TB knowledge (COR = 1.49; 95% CI = 1.03–2.18) and a favorable attitude (COR = 1.41; 95% CI = 1.02–1.95) were also associated with having a good practice but was only in the bivariate analysis (Table 5).

### Discussion

This study revealed gaps in knowledge, attitudes and practices among northern Ethiopian prisoners with regard to TB. Only about four out of ten prisoners were able to recognize germ/bacteria as a cause of TB. The large majority related TB to exposure to cold wind, spoiled soil (a soil with a bad odor), poor hygiene, and smoking. The majority (63.7%) was not aware of the possibility of getting multi-drug-resistant strains due to treatment non-adherence. Overall, only 24% knew the basic elements about TB, 41% had favorable attitudes, and a bit more than a half (55%) had a good practice towards TB. TB knowledge, level of attitude and practice were all significantly related to the level of education, and study sites.

When compared to a previous report from Eastern Ethiopian prisons, the proportion of prisoners that mentioned the correct cause of TB is remarkably high in our study (37.7% vs. 1.6%) [19]. Knowledge on the transmission (88.0% vs. 74.1%) and free treatment availability (64.5% vs. 50.3%) is also higher in the current study. This discrepancy could be due to the time difference; knowledge level could vary over time owing to the routine health education activities and improved public media access [23]. The prison health personnel reported that they sometimes provide health education to prisoners about health issues in general. The spatial difference, and associated socio-cultural differences, between the two Ethiopian studies might also partly explain the discrepancy [16]. Similarly, the knowledge about the cause of TB (37.7%), a cough of 2 weeks or more as a TB symptom (79.1%), the airborne route of transmission (88.0%), and

**Table 2. Factors related to the level of knowledge about tuberculosis among northern Ethiopian prisoners in the bivariate and multivariate logistic regression analysis (N = 615).**

| Variable                              | Knowledge level |             |                  | COR (95% CI) | AOR (95% CI)     |
|---------------------------------------|-----------------|-------------|------------------|--------------|------------------|
|                                       | Good, n (%)     | Poor, n (%) |                  |              |                  |
| <b>All participants (N = 615)</b>     | 149 (24)        | 466 (76)    |                  |              |                  |
| <b>Age, years</b>                     |                 |             |                  |              |                  |
| 18–45                                 | 136 (25)        | 406 (75)    | 1.55 (0.82–2.91) |              | 1.08 (0.51–2.26) |
| ≥ 46                                  | 13 (18)         | 60 (82)     | ref              |              |                  |
| <b>Educational status</b>             |                 |             |                  |              |                  |
| Illiterate                            | 7 (9)           | 72 (91)     | 0.13 (0.06–0.29) |              | 0.17 (0.06–0.46) |
| Read and write only                   | 10 (14)         | 62 (86)     | 0.22 (0.1–0.43)  |              | 0.21 (0.08–0.52) |
| Primary                               | 42 (16)         | 215 (84)    | 0.25 (0.16–0.39) |              | 0.27 (0.15–0.48) |
| Secondary or above                    | 90 (44)         | 117 (56)    | ref              |              |                  |
| <b>Occupation before imprisonment</b> |                 |             |                  |              |                  |
| Government employee                   | 45 (60)         | 30 (40)     | 8.11 (4.62–14.3) |              | 2.92 (1.21–7.03) |
| Student                               | 22 (24)         | 69 (76)     | 1.73 (0.97–3.07) |              | 0.77 (0.33–1.76) |
| Unemployed                            | 5 (3)           | 12 (97)     | 2.25 (0.76–6.72) |              | 0.53 (0.13–2.09) |
| Private worker                        | 33 (22)         | 117 (78)    | 1.53 (0.92–2.52) |              | 0.59 (0.26–1.33) |
| Farmer                                | 44 (16)         | 238 (84)    | ref              |              |                  |
| <b>Residence</b>                      |                 |             |                  |              |                  |
| Urban                                 | 95 (34)         | 185 (66)    | 2.67 (1.82–3.92) |              | 2.16 (1.15–4.06) |
| Rural                                 | 54 (16)         | 281 (84)    | ref              |              |                  |
| <b>History of TB</b>                  |                 |             |                  |              |                  |
| Yes                                   | 7 (19)          | 30 (91)     | 0.72 (0.31–1.67) |              | -                |
| No                                    | 142 (25)        | 436 (75)    | ref              |              |                  |
| <b>Length of imprisonment</b>         |                 |             |                  |              |                  |
| >12 months                            | 74 (19)         | 323 (81)    | 0.92 (0.64–1.33) |              | -                |
| ≤12 months                            | 75 (34)         | 143 (66)    | ref              |              |                  |
| <b>Prison site</b>                    |                 |             |                  |              |                  |
| Wukro                                 | 2 (5)           | 40 (95)     | 0.15 (0.04–0.65) |              | 0.12 (0.03–0.57) |
| Abi-Adi                               | 4 (18)          | 18 (92)     | 0.67 (0.22–2.09) |              | 1.23 (0.37–4.47) |
| Humera                                | 3 (5)           | 57 (95)     | 0.16 (0.05–0.53) |              | 0.21 (0.06–0.74) |
| Alamata                               | 11 (23)         | 37 (77)     | 0.89 (0.42–1.92) |              | 1.58 (0.66–3.79) |
| Dessie                                | 28 (27)         | 75 (73)     | 1.13 (0.65–1.96) |              | 1.12 (0.58–2.14) |
| Debre Tabor                           | 27 (34)         | 53 (66)     | 1.54 (0.86–2.74) |              | 2.71 (1.36–5.42) |
| Finote Selam                          | 31 (36)         | 56 (64)     | 1.67 (0.96–2.92) |              | 4.16 (2.05–8.43) |
| Mekelle                               | 43 (25)         | 130 (75)    | ref              |              |                  |

AOR: adjusted odds ratio; COR: crude odds ratio; CI: confidence interval; TB: tuberculosis; ref: reference

<https://doi.org/10.1371/journal.pone.0174692.t002>

covering mouth/nose when coughing as a method of prevention (65.7%) was also higher when compared with reports from the general population in different parts of Ethiopia [10–14,24]. One explanation of this variation could be the fact that prisons are ideal settings for health interventions [25]; in prisons, it is easy to provide health education since a lot of people can be reached at one time compared to the scattered remote areas of the general population.

Very specific comparison with prisons of other sub-Saharan countries was not possible due to the lack of similar published data. However, studies conducted in Brazilian [17] and USA (Texas) [18] prisons reported a much lower knowledge level. In addition to the time difference, the difference in the prevalence of TB might explain the discrepancy, especially for the prison



**Table 3. Attitudes and practices of northern Ethiopian prisoners about tuberculosis stratified by the status of the previous history of TB disease, 2016 (N = 615).**

| Variable                                                  | Had history of TB, n (%)<br>n = 37 | Had no TB ever, n (%)<br>n = 578 | Total, n (%)<br>N = 615 | p-value ** |
|-----------------------------------------------------------|------------------------------------|----------------------------------|-------------------------|------------|
| <b>Thought on seriousness of TB diseases</b>              |                                    |                                  |                         | 0.23       |
| Very serious*                                             | 30 (81.1)                          | 488 (84.4)                       | 518 (84.2)              |            |
| Somewhat serious                                          | 4 (10.8)                           | 71 (12.3)                        | 75 (12.2)               |            |
| Not serious                                               | 3 (8.1)                            | 19 (3.3)                         | 22 (5.6)                |            |
| <b>Reaction if had TB symptoms</b>                        |                                    |                                  |                         | 0.29       |
| Fear                                                      | 6 (16.2)                           | 115 (19.9)                       | 121 (19.7)              |            |
| Shame                                                     | 2 (5.4)                            | 23 (4.0)                         | 25 (4.1)                |            |
| Sadness/hopelessness                                      | 4 (10.8)                           | 40 (6.9)                         | 44 (7.2)                |            |
| Visit health facility*                                    | 25 (67.6)                          | 400 (69.2)                       | 425 (69.0)              |            |
| <b>Feelings about people with TB diseases</b>             |                                    |                                  |                         | 0.69       |
| I feel compassion and a desire to help*                   | 30 (81.1)                          | 417 (72.1)                       | 447 (72.7)              |            |
| I feel compassion, but stay away from such people         | 4 (10.8)                           | 111 (19.2)                       | 115 (18.7)              |            |
| I fear them because they may infect me                    | 2 (5.4)                            | 35 (6.1)                         | 37 (6.0)                |            |
| I have no particular feeling                              | 1 (2.7)                            | 15 (2.6)                         | 16 (2.6)                |            |
| <b>Choice for TB treatment</b>                            |                                    |                                  |                         | 0.027      |
| Modern health care¶                                       | 29 (78.4)                          | 479 (82.9)                       | 508 (82.6)              |            |
| Traditional healers                                       | 5 (13.5)                           | 23 (4.0)                         | 28 (4.5)                |            |
| Holy water                                                | 1 (2.7)                            | 39 (6.7)                         | 40 (6.6)                |            |
| Don't know                                                | 2 (5.4)                            | 37 (6.4)                         | 39 (6.3)                |            |
| <b>Time point to visit health facility</b>                |                                    |                                  |                         | 0.73       |
| When treatment of my own does not work                    | 0 (0)                              | 16 (2.8)                         | 16 (2.6)                |            |
| As soon as realizing the symptoms might be related to TB¶ | 24 (64.9)                          | 376 (65.1)                       | 400 (65.0)              |            |
| After 3–4 weeks of having symptoms                        | 12 (32.4)                          | 165 (28.5)                       | 177 (28.8)              |            |
| I would not go to a doctor                                | 1 (2.7)                            | 21 (3.6)                         | 22 (3.6)                |            |

TB: Tuberculosis

\*: the three crucial elements for attitude

¶: the two crucial elements for practice

\*\*: p-value from the chi-square test

<https://doi.org/10.1371/journal.pone.0174692.t003>

in the USA [26]. In those areas, prisoners might not give much attention to TB while it is a common issue in high burden areas.

In general, from the above comparisons, we see that northern Ethiopian prisoners had a fairly high level of knowledge about the symptoms, transmission, and prevention of TB. This might suggest good health seeking behavior among our prisoners since several studies showed an association between knowledge of TB and early treatment seeking [7,9]. However, this seems not entirely true in daily practice since in our previous TB survey, half of the TB cases were left undiagnosed for long periods; some were even coughing for more than two years [4]. Other factors such as a poor referral system might also contribute significantly to severe treatment delay [4]. Therefore, we suggest that educational interventions in the study prisons should not only focus on delivering the message, but should also ensure that the knowledge gained can lead to appropriate treatment through regular monitoring and evaluation and clearly defined treatment protocols. We also observed a relatively high level of knowledge on the cause of TB; but, this can be called not good enough as the majority (62%) remained having several misconceptions. The ‘exposure to cold wind’ was the most frequently mentioned

**Table 4. Factors related to the level of attitude about tuberculosis among northern Ethiopian prisoners in the bivariate and multivariate logistic regression analysis (N = 615).**

| Variable                              | Level of attitude |                    | COR (95% CI)     | AOR (95% CI)     |
|---------------------------------------|-------------------|--------------------|------------------|------------------|
|                                       | Favorable, n (%)  | Unfavorable, n (%) |                  |                  |
| <b>All participants (N = 615)</b>     | 250 (41)          | 365 (59)           |                  |                  |
| <b>Age, years</b>                     |                   |                    |                  |                  |
| 18–45                                 | 220 (41)          | 322 (59)           | 0.98 (0.59–1.61) | -                |
| ≥46                                   | 30 (4)            | 43 (96)            | ref              |                  |
| <b>Educational status</b>             |                   |                    |                  |                  |
| Illiterate                            | 19 (24)           | 60 (76)            | 0.25 (0.14–0.45) | 0.31 (0.15–0.64) |
| Read and write only                   | 20 (3)            | 52 (97)            | 0.31 (0.17–0.55) | 0.34 (0.16–0.68) |
| Primary                               | 96 (37)           | 161 (63)           | 0.48 (0.33–0.69) | 0.46 (0.29–0.72) |
| Secondary or above                    | 115 (56)          | 92 (44)            | ref              |                  |
| <b>Occupation before imprisonment</b> |                   |                    |                  |                  |
| Government employee                   | 33 (44)           | 42 (56)            | 1.88 (1.12–3.18) | 0.92 (0.44–1.94) |
| Student                               | 50 (55)           | 41 (45)            | 2.92 (1.79–4.75) | 1.88 (1.1–3.5)   |
| Unemployed                            | 8 (47)            | 9 (53)             | 2.13 (0.79–5.74) | 1.38 (0.44–4.41) |
| Private worker                        | 76 (51)           | 74 (49)            | 2.46 (1.63–3.71) | 1.41 (0.76–2.62) |
| Farmer                                | 83 (29)           | 199 (71)           | ref              |                  |
| <b>Residence</b>                      |                   |                    |                  |                  |
| Urban                                 | 138 (49)          | 142 (51)           | 1.94 (1.39–2.68) | 0.93 (0.56–1.53) |
| Rural                                 | 112 (33)          | 223 (67)           | ref              |                  |
| <b>History of TB</b>                  |                   |                    |                  |                  |
| Yes                                   | 14 (38)           | 23 (62)            | 0.88 (0.44–1.75) | -                |
| No                                    | 236 (41)          | 342 (59)           | ref              |                  |
| <b>Length of imprisonment</b>         |                   |                    |                  |                  |
| >12 months                            | 161 (41)          | 236 (59)           | 1.12 (0.81–1.55) | -                |
| ≤12 months                            | 89 (40)           | 129 (60)           | ref              |                  |
| <b>Prison site</b>                    |                   |                    |                  |                  |
| Wukro                                 | 9 (21)            | 33 (79)            | 0.3 (0.14–0.67)  | 0.29 (0.13–0.68) |
| Abi Adi                               | 14 (64)           | 8 (36)             | 1.94 (0.78–4.87) | 2.44 (0.93–6.39) |
| Humera                                | 30 (50)           | 30 (50)            | 1.11 (0.61–1.99) | 1.42 (0.74–2.71) |
| Alamata                               | 2 (4)             | 46 (96)            | 0.05 (0.01–0.21) | 0.06 (0.01–0.24) |
| Dessie                                | 57 (53)           | 46 (47)            | 1.38 (0.84–2.24) | 1.42 (0.75–2.71) |
| Debre tabor                           | 24 (30)           | 56 (70)            | 0.48 (0.27–0.83) | 0.56 (0.31–1.03) |
| Finote selam                          | 32 (37)           | 55 (63)            | 0.65 (0.38–1.09) | 0.94 (0.53–1.68) |
| Mekelle                               | 82 (47)           | 91 (53)            | ref              |                  |

AOR: adjusted odds ratio; COR: crude odds ratio; CI: confidence interval; TB: tuberculosis; ref: reference

<https://doi.org/10.1371/journal.pone.0174692.t004>

misconception. This is not surprising as this misconception is common in Ethiopia as shown by previous studies from the general population [11–13], and eastern Ethiopian prisons six years ago [19]. This misconception could still be an important catalyst for the spread of TB, especially in the severely overcrowded Ethiopian prisons [4,27]. It is completely contra-effective if people would tend to keep their windows closed to protect them from the "cold wind", while ventilation is important in preventing TB. Our observation substantiates this report in that 12% mentioned keeping windows closed as a preventive measure when they are with chronically coughing people and/or TB patients in a room. This issue should be stressed when delivering health education in Ethiopian prisons.

**Table 5. Factors associated with the level of practice towards tuberculosis among northern Ethiopian prisoners in the bivariate and multivariate logistic regression analysis (N = 615).**

| Variable                              | Level of practice |             | COR (95% CI)     | AOR (95% CI)     |
|---------------------------------------|-------------------|-------------|------------------|------------------|
|                                       | Good, n (%)       | Poor, n (%) |                  |                  |
| <b>All participants(N = 615)</b>      | 338 (55)          | 277 (45)    |                  |                  |
| <b>Age, years</b>                     |                   |             |                  |                  |
| 18–45                                 | 293 (54)          | 249 (46)    | 0.73 (0.44–1.01) | 0.74 (0.42–1.29) |
| ≥46                                   | 45 (62)           | 28 (38)     | ref              |                  |
| <b>Educational status</b>             |                   |             |                  |                  |
| Illiterate                            | 31 (39)           | 48 (61)     | 0.41 (0.24–0.69) | 0.35 (0.18–0.69) |
| Read and write only                   | 40 (56)           | 32 (44)     | 0.79 (0.46–1.36) | 0.55 (0.27–1.11) |
| Primary                               | 140 (55)          | 117 (45)    | 0.75 (0.52–1.09) | 0.7 (0.44–1.11)  |
| Secondary or above                    | 127 (61)          | 80 (39)     | ref              |                  |
| <b>Occupation before imprisonment</b> |                   |             |                  |                  |
| Government employee                   | 48 (64)           | 27 (26)     | 1.52 (0.89–2.57) | 0.94 (0.48–1.85) |
| Student                               | 48 (53)           | 43 (47)     | 0.96 (0.59–1.53) | 0.65 (0.36–1.15) |
| Unemployed                            | 8 (47)            | 9 (53)      | 0.76 (0.29–2.21) | 0.51 (0.18–1.45) |
| Private worker                        | 82 (55)           | 68 (45)     | 1.03 (0.69–1.54) | 0.82 (0.49–1.38) |
| Farmer                                | 152 (54)          | 130 (46)    | ref              |                  |
| <b>Residence</b>                      |                   |             |                  |                  |
| Urban                                 | 159 (57)          | 121 (43)    | 1.15 (0.83–1.58) | -                |
| Rural                                 | 179 (53)          | 156 (47)    | ref              |                  |
| <b>History of TB</b>                  |                   |             |                  |                  |
| Yes                                   | 21 (57)           | 16 (43)     | 1.08 (0.55–2.11) | -                |
| No                                    | 317 (55)          | 261 (45)    | ref              |                  |
| <b>Length of imprisonment</b>         |                   |             |                  |                  |
| >12 months                            | 203 (51)          | 194 (49)    | 1.05 (0.76–1.44) | -                |
| ≤12 months                            | 135 (62)          | 83 (38)     | ref              |                  |
| <b>Prison site</b>                    |                   |             |                  |                  |
| Wukro                                 | 22 (52)           | 20 (48)     | 0.8 (0.41–1.58)  | 0.95 (0.47–1.94) |
| Abi-Adi                               | 13 (59)           | 9 (41)      | 1.05 (0.43–2.59) | 1.18 (0.46–3.1)  |
| Humera                                | 20 (25)           | 40 (75)     | 0.37 (0.19–0.68) | 0.38 (0.2–0.72)  |
| Alamata                               | 15 (32)           | 33 (68)     | 0.33 (0.17–0.66) | 0.39 (0.19–0.82) |
| Dessie                                | 53 (51)           | 50 (49)     | 0.77 (0.47–1.26) | 0.77 (0.46–1.23) |
| Debre Tabor                           | 58 (72)           | 22 (28)     | 1.93 (1.08–3.42) | 2.18 (1.19–4.0)  |
| Finote Selam                          | 57 (66)           | 30 (34)     | 1.39 (0.81–2.36) | 1.44 (0.8–2.58)  |
| Mekelle                               | 100 (58)          | 73 (42)     | ref              |                  |
| <b>Knowledge</b>                      |                   |             |                  |                  |
| Good                                  | 93 (62)           | 56 (38)     | 1.49 (1.03–2.18) | 1.05 (0.67–1.63) |
| Poor                                  | 245 (53)          | 221 (47)    | ref              |                  |
| <b>Attitude</b>                       |                   |             |                  |                  |
| Favorable                             | 150 (60)          | 100 (40)    | 1.41 (1.02–1.95) | 1.32 (0.92–1.92) |
| Unfavorable                           | 188 (52)          | 177 (48)    | ref              |                  |

AOR: adjusted odds ratio; COR: crude odds ratio; CI: confidence interval; TB: tuberculosis; ref: reference

<https://doi.org/10.1371/journal.pone.0174692.t005>

In the current study, about one-fourth had perceived stigma towards TB patients which is slightly higher than the study from Brazil (21.6%) [17], but lower than those observed in the USA (43.0%) [18], Amhara region (58.3%) [10], and southwest Ethiopia (51.2%) [14]. The relatively favorable outcome on this variable in our study could be the result of routine health

education that has been delivered to the prisoners. In our study prisons, the prison health professionals reported that they provide routine health education to prisoners on infectious diseases including TB. Stigmatization has been shown to have a direct impact on health care seeking and infection prevention [7]. In order to avoid the social isolation, TB patients may deliberately conceal their status, infecting many more people. This would particularly have severe consequences in prison settings. While the relatively low level of stigmatization in our study is encouraging, further efforts are still needed to ensure more acceptable and useful attitudes towards TB.

With regard to the practice, although the majority (82.6%) had preference to the modern health care, it is worthy to note that a substantial proportion preferred traditional healers (herbs) and holy water sites as a first priority for treatment. This is in line with the previous studies from eastern Ethiopian prisons [19] and reports from the general population in Tigray [12], Amhara [10], and Afar [11] regions. Such misconceptions should be targeted as they contribute to treatment delay and spreading of the disease [7,8]. However, TB control in sub-Saharan prisons remains neglected by policy makers [28]. Studies suggest the need to shift from considering TB in prisons as a problem of the prison population to considering it as a problem to the larger civilian community [29,30]. We suggest that, for the national TB program to be successful, the concerned bodies such as the federal ministry of health, regional health bureaus, and non-governmental organizations (NGOs) should give priority attention to Ethiopian prisons and use this scientific evidence to help design and provide appropriate health education in the settings. The prison health personnel should be given a sensitization training tailored at the identified misconceptions and continuous support is needed to ensure the quality and the sustainability of the health education.

We also identified some factors that were associated with prisoner's KAP of TB. The level of education was one of the independent predictors for KAP which is consistent with previous reports in Ethiopia [12,13] and elsewhere [31,32]. This relationship could be taken as an opportunity to consider peer mentorship; relatively educated prisoners could be trained and provide routine health education to their fellow inmates, especially in resource-limited prisons of the sub-Saharan Africa. By occupation, prisoners who were government employees were more likely to have a higher awareness about TB. This is an expected relation as these groups are highly educated compared to farmers. There was also knowledge variability by residence; urban dwellers being more knowledgeable. This is in agreement with previous findings [12]. Differences in literacy status, and access to health service and media might justify the relation.

There was also a significant variation of the TB KAP across the study sites. Compared to prisoners of Mekelle, prisoners of Debre Tabor and Finote Selam were more knowledgeable, whereas those imprisoned in Wukro and Humera were less knowledgeable. This local variation is consistent with the previous reports from Eastern Ethiopian prisons [19] and Ghana [16]. From our observations, the number of health personnel (prison nurses) and the availability of a media center in the study prisons were roughly comparable. Mekelle prison had a slightly better medical clinic and more adequate drug stocks. The differences in the commitment of the prison health personnel in delivering health information might otherwise justify the discrepancy. Humera prison is in a remote area with a relatively harsh weather condition which might influence health personnel's routine activities. These findings might indicate the need to consider geographical differences when designing and implementing educational interventions on TB so as to make the maximum impact.

Some limitations of the study should be mentioned. The fact that we used different interviewers for different prisons might have influenced the consistency of the interview. Our study also shares limitations of other studies that use KAP questionnaires. The truthfulness of the respondents' answers remains difficult, especially for the attitude and belief items [17].

Considering these issues, the data collectors were well trained and informed not to give leading questions and strict supervision was done throughout the interview process.

## Conclusions

This study revealed that knowledge of prisoners about the cause of TB and consequences of non-adherence to TB treatment was low. Knowledge on the transmission, symptoms, and prevention was fairly high. However, the overall knowledge on the basic elements of TB remains low and appeared to significantly vary by study site, and socio-demographic characteristics of prisoners. Health education interventions, focused on the cause and the importance of early diagnosis and treatment are needed in all the study prisons, but special attention should be given to less educated prisoners, and prisons with a high number of inmates and those in remote areas.

## Supporting information

### S1 File.

(SAV)

### S2 File.

(PDF)

## Acknowledgments

We would like to thank the staffs of the Prison Administration of Tigray and Amhara Regional States, especially Commander Tsegay Uqubay and Commander Workneh for their invaluable support to enter into the prison system.

## Author Contributions

**Conceptualization:** KA MS LJ DN GJD.

**Data curation:** KA LJ DN.

**Formal analysis:** KA MS LJ DN.

**Investigation:** KA LJ DN.

**Methodology:** KA MS LJ DN GJD.

**Writing – review & editing:** KA MS LJ DN SFA GJD.

## References

1. World Health Organization. Global tuberculosis report. Geneva, Switzerland; 2016.
2. Baussano I, Williams BG, Nunn P, Beggiato M, Fedeli U, Scano F. (2010) Tuberculosis incidence in prisons: a systematic review. *PLoS Med.* 7(12):e1000381. <https://doi.org/10.1371/journal.pmed.1000381> PMID: 21203587
3. World Health Organization. Status paper on prisons and tuberculosis. Copenhagen: World Health Organization Regional Office for Europe; 2007
4. Adane K, Spigt M, Ferede S, Asmelash T, Abebe M, Dinant G-J. (2016) Half of Pulmonary Tuberculosis Cases Were Left Undiagnosed in Prisons of the Tigray Region of Ethiopia: Implications for Tuberculosis Control. *PloS one.* 11(2):e0149453. <https://doi.org/10.1371/journal.pone.0149453> PMID: 26914770
5. Abebe D, Bjune G, Ameni G, Biffa D, Abebe F. (2011) Prevalence of pulmonary tuberculosis and associated risk factors in Eastern Ethiopian prisons. *Int. J. Tuberc. Lung Dis.* 15(5):668–673. <https://doi.org/10.5588/ijtld.10.0363> PMID: 21756520

6. World Health Organization. Global tuberculosis report. Geneva, Switzerland; 2014.
7. Storla DG, Yimer S, Bjune GA.(2008) A systematic review of delay in the diagnosis and treatment of tuberculosis. *BMC public health*. 8(1):1.
8. Saifodine A, Gudo PS, Sidat M, Black J.(2013) Patient and health system delay among patients with pulmonary tuberculosis in Beira city, Mozambique. *BMC public health*. 13(1):1.
9. Cramm JM, Finkenflügel HJ, Møller V, Nieboer AP.(2010) TB treatment initiation and adherence in a South African community influenced more by perceptions than by knowledge of tuberculosis. *BMC public health*. 10(1):1.
10. Esmael A, Ali I, Agonafir M, Desale A, Yaregal Z, Desta K.(2013) Assessment of patients' knowledge, attitude, and practice regarding pulmonary tuberculosis in eastern Amhara regional state, Ethiopia: cross-sectional study. *Am. J. Trop. Med. Hyg.* 88(4):785–788. <https://doi.org/10.4269/ajtmh.12-0312> PMID: 23419364
11. Legesse M, Ameni G, Mamo G, Medhin G, Shawel D, Bjune G, et al.(2010) Knowledge and perception of pulmonary tuberculosis in pastoral communities in the middle and Lower Awash Valley of Afar region, Ethiopia. *BMC public health*. 10(1):1.
12. Mesfin MM, Tasew TW, Tareke IG, Mulugeta GW, Richard MJ.(2005) Community knowledge, attitudes and practices on pulmonary tuberculosis and their choice of treatment supervisor in Tigray, northern Ethiopia. *Ethiop. j. health dev.* 19(1):21.
13. Bati J, Legesse M, Medhin G.(2013) Community's knowledge, attitudes and practices about tuberculosis in Itang special district, Gambella region, south western Ethiopia. *BMC public health*. 13(1):1.
14. Abebe G, Deribew A, Apers L, Woldemichael K, Shiffa J, Tesfaye M, et al.(2010) Knowledge, health seeking behavior and perceived stigma towards tuberculosis among tuberculosis suspects in a rural community in southwest Ethiopia. *PLoS One*. 5(10):e13339. <https://doi.org/10.1371/journal.pone.0013339> PMID: 20948963
15. Chinenye Nwankwo Mercy.(2015) Evaluation of Knowledge, Attitude and Practices of TB Diagnosed Patients in Rwanda towards TB Infection. Case of TB Diagnosed Patients in Kigali Urban and Rural Health Facilities. *IJSRP*. 5(8)
16. Amo-Adjei J, Kumi-Kyereme A.(2013) Myths and misconceptions about tuberculosis transmission in Ghana. *BMC Int Health Hum Rights*. 13(1):1.
17. Ferreira S Junior, Oliveira HBd, Marin-Leon L.(2013) Knowledge, attitudes and practices on tuberculosis in prisons and public health services. *Revista Brasileira de Epidemiologia*. 16(1):100–113. PMID: 23681327
18. Woods GL, Harris SL, Solomon D.(1997) Tuberculosis knowledge and beliefs among prison inmates and lay employees. *J. Correct. Health Care*. 4(1):61–71.
19. Abebe D, Biffa D, Bjune G, Ameni G, Abebe F.(2011) Assessment of knowledge and practice about tuberculosis among eastern Ethiopian prisoners. *Int. J. Tuberc. Lung Dis.* 15(2):228–233. PMID: 21219686
20. Baker L, Wagner TH, Singer S, Bundorf MK.(2003) Use of the Internet and e-mail for health care information: results from a national survey. *JAMA*. 289(18):2400–2406. <https://doi.org/10.1001/jama.289.18.2400> PMID: 12746364
21. Walmsley R, Britain G. World prison population list. Home Office London, England; 2010.
22. World Health Organization. A Guide to Developing Knowledge, Attitude, and Practice Surveys *Suiza*: WHO; 2008.
23. Morisky DE, Malotte CK, Choi P, Davidson P, Rigler S, Sugland B, et al.(1990) A patient education program to improve adherence rates with antituberculosis drug regimens. *Health Educ Behav*. 17(3):253–266.
24. Tolossa D, Medhin G, Legesse M.(2014) Community knowledge, attitude, and practices towards tuberculosis in Shinile town, Somali regional state, eastern Ethiopia: a cross-sectional study. *BMC public health*. 14(1):1.
25. Aerts A, Hauer B, Wanlin M, Veen J.(2006) Tuberculosis and tuberculosis control in European prisons. *Int. J. Tuberc. Lung Dis.* 10(11):1215–1223. PMID: 17131779
26. Baillargeon J, Black SA, Leach CT, Jenson H, Pulvino J, Bradshaw P, et al.(2004) The infectious disease profile of Texas prison inmates. *Preventive Medicine*. 38(5):607–612. <https://doi.org/10.1016/j.ypmed.2003.11.020> PMID: 15066363
27. The Ethiopian Human Rights Commission. Human Rights Protection Monitoring in Ethiopian Prisons Addis Ababa;2012.

28. O'Grady J, Hoelscher M, Atun R, Bates M, Mwaba P, Kapata N, et al. (2011) Tuberculosis in prisons in sub-Saharan Africa—the need for improved health services, surveillance and control. *Tuberculosis*. 91 (2):173–178. <https://doi.org/10.1016/j.tube.2010.12.002> PMID: 21251881
29. Editors PM. (2010) The health crisis of tuberculosis in prisons extends beyond the prison walls. *PLoS Med*. 7(12):e1000383. <https://doi.org/10.1371/journal.pmed.1000383> PMID: 21203581
30. Sacchi FP, Praça RM, Tatara MB, Simonsen V, Ferrazoli L, Croda MG, et al. (2015) Prisons as reservoir for community transmission of tuberculosis, Brazil. *Emerg Infect Dis*. 21(3):452–5. <https://doi.org/10.3201/eid2103.140896> PMID: 25642998
31. Hoa NP, Thorson AE, Long NH, Diwan VK. (2003) Knowledge of tuberculosis and associated health-seeking behaviour among rural Vietnamese adults with a cough for at least three weeks. *Scand. J. of Public Health*. 31(62 suppl):59–65.
32. Hoa NP, Chuc NTK, Thorson A. (2009) Knowledge, attitudes, and practices about tuberculosis and choice of communication channels in a rural community in Vietnam. *Health Policy*. 90(1):8–12. <https://doi.org/10.1016/j.healthpol.2008.08.006> PMID: 18835056
