# Supplementary material for: Tuberculosis knowledge, attitudes, and practices among northern Ethiopian prisoners: Implications for TB control efforts
Source: PubMed Central journal article supplement (PMC5373603; doi:10.1371/journal.pone.0174692), 2017-03-30
Supplement: pone.0174692.s002.pdf [file pone.0174692.s002.pdf]

Date \_\_\_\_\_ Name of the prison \_\_\_\_\_  
 Code \_\_\_\_\_ Room No. \_\_\_\_\_ Block No. \_\_\_\_\_  
 Name of interviewer \_\_\_\_\_ Mobile No \_\_\_\_\_

**KAP Survey questionnaire for Ethiopian prisoners**

**Part I: Socio-demographic characteristics**

| S.No                                       | Questions                                               | Coding category/response                                                                                                                                                                  |
|--------------------------------------------|---------------------------------------------------------|-------------------------------------------------------------------------------------------------------------------------------------------------------------------------------------------|
| 1.                                         | Age in years                                            | _____ years                                                                                                                                                                               |
| 2.                                         | Sex                                                     | 1. Female<br>2. Male                                                                                                                                                                      |
| 3.                                         | Marital status                                          | 1. Single<br>2. Married<br>3. Divorced<br>4. Widowed                                                                                                                                      |
| 4.                                         | Education                                               | 1. Not able to read and write<br>2. Able to read and write without formal school year<br>3. Primary (1-8)<br>4. Secondary (9-10 or 12)<br>5. College (10+ or 12+)<br>6. University degree |
| 5.                                         | Occupation before imprisonment                          | 1. Civil servant(gov't)<br>2. Farmers<br>3. Private worker<br>4. Student<br>5. Unemployed<br>6. Others (specify _____)                                                                    |
| 6.                                         | Residence place (before imprisonment)                   | 1. Rural<br>2. Urban                                                                                                                                                                      |
| 7.                                         | Type of prisoner                                        | 1. New entrant<br>2. Not new entrant but on process<br>3. Not new entrant and sentenced                                                                                                   |
| 8.                                         | How long have you imprisoned in this prison?            | _____ months                                                                                                                                                                              |
| 9.                                         | Have you ever been had a TB disease?                    | 1. Yes<br>2. No                                                                                                                                                                           |
| <b>Part II: TB knowledge and awareness</b> |                                                         |                                                                                                                                                                                           |
| 10.                                        | What do you think are causes of TB?<br>(chose only one) | 1. Bad luck/curse<br>2. Bacteria (germs)<br>3. Demon<br>4. Cold wind<br>5. Spoiled soil (soil with a bad odor)                                                                            |

Date \_\_\_\_\_ Name of the prison \_\_\_\_\_  
 Code \_\_\_\_\_ Room No. \_\_\_\_\_ Block No. \_\_\_\_\_  
 Name of interviewer \_\_\_\_\_ Mobile No \_\_\_\_\_

|     |                                                                                               |                                                                                                                                                                                                                                                                                                                                                |
|-----|-----------------------------------------------------------------------------------------------|------------------------------------------------------------------------------------------------------------------------------------------------------------------------------------------------------------------------------------------------------------------------------------------------------------------------------------------------|
|     |                                                                                               | 6. Smoking<br>7. Poor hygiene<br>8. Malnutrition<br>9. I don't know<br>10. Others (specify) .....                                                                                                                                                                                                                                              |
| 11. | Do you know how can a person get infected with TB?(chose only one)                            | 1. Through handshake<br>2. Through the air when the infected person coughs or sneezes<br>3. Through sharing food with infected person<br>4. By clothes with infected person<br>5. Don't know<br>6. Other (specify) -----                                                                                                                       |
| 12. | What are the signs and symptoms of TB?<br>(Please check all that are mentioned)               | 1. Rash<br>2. Cough that lasts longer than 2 weeks<br>3. Coughing up blood<br>4. Severe headache<br>5. Nausea<br>6. Weight loss<br>7. Fever without clear cause that lasts more than 7 days<br>8. Chest pain<br>9. Shortness of breath<br>10. Ongoing fatigue<br>11. Do not know<br>12. Others (specify) _____                                 |
| 13. | How can we prevent our self from being infected by TB? (Please check all that are mentioned.) | 1. Avoid shaking hands<br>2. Covering mouth and nose when coughing or sneezing<br>3. Avoid sharing dishes<br>4. Washing hands after touching items in public places<br>5. Closing windows at home<br>6. Through good nutrition<br>7. By praying<br>8. By vaccination<br>9. By isolating TB patients<br>10. Do not know<br>11. Others (specify) |

Date \_\_\_\_\_ Name of the prison \_\_\_\_\_  
 Code \_\_\_\_\_ Room No. \_\_\_\_\_ Block No. \_\_\_\_\_  
 Name of interviewer \_\_\_\_\_ Mobile No \_\_\_\_\_

|                                           |                                                                                                                            |                                                                                                                                                                                                                                                |
|-------------------------------------------|----------------------------------------------------------------------------------------------------------------------------|------------------------------------------------------------------------------------------------------------------------------------------------------------------------------------------------------------------------------------------------|
| 14.                                       | What is the best treatment for TB? (chose only one)                                                                        | <ol style="list-style-type: none"> <li>1. Herbal Remedies</li> <li>2. Home Remedies</li> <li>3. Praying /holy water</li> <li>4. Don't Know</li> <li>5. Modern drugs</li> </ol>                                                                 |
| 15.                                       | According to you, can a TB affected person be cured?(chose only one)                                                       | <ol style="list-style-type: none"> <li>1. Yes, completely</li> <li>2. Yes, partially</li> <li>3. No</li> </ol>                                                                                                                                 |
| 16.                                       | If yes, how long should the treatment be taken to cure TB?                                                                 | _____ weeks/months or don't know                                                                                                                                                                                                               |
| 17.                                       | Do you know any danger if a TB patient is not taking treatment? (Please check all that are mentioned)                      | <ol style="list-style-type: none"> <li>1. Death</li> <li>2. Infects others</li> <li>3. Losses weight</li> <li>4. Develops sever health problems</li> <li>5. I don't know</li> <li>6. Others (specify) _____</li> </ol>                         |
| 18.                                       | Do you know any danger if a TB patient is not taking the drug properly or defaulted? Please check all that are mentioned.) | <ol style="list-style-type: none"> <li>1. Death</li> <li>2. Relapse</li> <li>3. Inability to cure infection</li> <li>4. Drug resistance</li> <li>5. Don't know</li> </ol>                                                                      |
| <b>B. Attitude and practices about TB</b> |                                                                                                                            |                                                                                                                                                                                                                                                |
| 19.                                       | In your opinion, how serious disease is TB? (chose only one)                                                               | <ol style="list-style-type: none"> <li>1. Very serious</li> <li>2. Somewhat serious</li> <li>3. Not very serious</li> </ol>                                                                                                                    |
| 20.                                       | Do you afraid to get infected with TB? (chose only one)                                                                    | <ol style="list-style-type: none"> <li>1. Yes</li> <li>2. No</li> </ol>                                                                                                                                                                        |
| 21.                                       | What would be your reaction if you were found out that you have TB? (chose only one)                                       | <ol style="list-style-type: none"> <li>1. Fear</li> <li>2. Surprise</li> <li>3. Shame</li> <li>4. Sadness or hopelessness</li> <li>5. Seek immediate medication</li> </ol>                                                                     |
| 22.                                       | What would you do if you thought you had symptoms of TB? (chose only one)                                                  | <ol style="list-style-type: none"> <li>1. Go to a health facility</li> <li>2. Go to pharmacy</li> <li>3. Got to traditional healer</li> <li>4. Pursue other self-treatment options (herbs, etc.)</li> <li>5. Others (specify) _____</li> </ol> |

Date \_\_\_\_\_ Name of the prison \_\_\_\_\_  
 Code \_\_\_\_\_ Room No. \_\_\_\_\_ Block No. \_\_\_\_\_  
 Name of interviewer \_\_\_\_\_ Mobile No \_\_\_\_\_

|     |                                                                                                            |                                                                                                                                                                                                                                                                                                                                                                             |
|-----|------------------------------------------------------------------------------------------------------------|-----------------------------------------------------------------------------------------------------------------------------------------------------------------------------------------------------------------------------------------------------------------------------------------------------------------------------------------------------------------------------|
| 23. | If you had symptoms of TB, at what point would you go to the health facility? (chose only one)             | <ol style="list-style-type: none"> <li>1. When treatment on my own does not work.</li> <li>2. When symptoms that look like TB signs last for 3–4 weeks.</li> <li>3. As soon as I realize that my symptoms might be related to TB.</li> <li>4. I would not go to the doctor.</li> </ol>                                                                                      |
| 24. | If you would not go to the health facility, what is the reason? (Please check all that apply)              | <ol style="list-style-type: none"> <li>1. Not sure where to go</li> <li>2. Cost</li> <li>3. Difficulties with transportation/distance to clinic</li> <li>4. Do not trust medical workers</li> <li>5. Do not like attitude of medical workers</li> <li>6. Prison personnel refuses to refer me</li> <li>7. Other (specify) _____</li> </ol>                                  |
| 25. | How expensive do you think TB treatment is in Ethiopia? (chose only one)                                   | <ol style="list-style-type: none"> <li>1. It is free of charge</li> <li>2. It is reasonably priced</li> <li>3. It is somewhat/moderately expensive</li> <li>4. It is very expensive</li> </ol>                                                                                                                                                                              |
| 26. | Which do you think? Is TB higher in prisons or in the community? (chose only one)                          | <ol style="list-style-type: none"> <li>1. In prisons</li> <li>2. In the community</li> </ol>                                                                                                                                                                                                                                                                                |
| 27. | If you say in prisons, what do you think are the factors for this high risk? (Please check all that apply) | <ol style="list-style-type: none"> <li>1. Inadequate access to food and health services</li> <li>2. Overcrowding</li> <li>3. Poor ventilation</li> <li>4. Easily acquiring TB infection</li> <li>5. Don't know</li> <li>6. Others (specify) _____</li> </ol>                                                                                                                |
| 28. | Which statement is closest to your feeling about people with TB disease?                                   | <ol style="list-style-type: none"> <li>1. "I feel compassion and desire to help."</li> <li>2. "I feel compassion, but I tend to stay away from these people."</li> <li>3. "It is their problem and I cannot get TB."</li> <li>4. "I fear them because they may infect me."</li> <li>5. "I have no particular feeling."</li> <li>6. Other (please explain): _____</li> </ol> |

Thank you!
